# Supplementary material for: CO2 reduction on single-atom Ir catalysts with chemical functionalization
Source: Royal Society of Chemistry journal article supplement (doi:10.1039/d1cp04969k), 2022-01-01
Supplement: d1cp04969k3.xlsx [file d1cp04969k3.xlsx]

## Sheet: Sheet1
Supplementary Information IV
	G(n, U) at U = 0	solvation	ZPE	∫CpdT - TS	P-correction	total		G	note
CO2(g)	-25.627		0.258182	-0.558269		-25.9271		0
H2(g)	-6.895		0.26561	-0.313094		-6.94248
H2O(l)	-15.3422		0.545398	-0.481206	-0.086753	-15.3648			liquid 3534 Pa
CO(g)	-16.5078		0.122587	-0.521779		-16.907		0.597768
HCOOH(aq)	-32.679		0.875935	-0.657618	-0.221844	-32.6825		0.187052	a=0.01 19 Pa
HCHO(aq)	-23.8925		0.704122	-0.590705	-0.229739	-24.0088		0.438437	a=0.01 14 Pa
CH3OH(aq)	-32.1572		1.34805	-0.619413	-0.072727	-31.5013		-0.111561	a=0.01 6080 Pa
CH4(g)	-24.9573		1.20027	-0.53552		-24.2926		-1.32515
IrF3	-785.956	-0.151959	0.190548	-0.214963		-786.132		0
IrF3-HCOO	-815.196	-0.452206	0.838286	-0.243948		-815.054		0.476641
IrF3-COOH	-815.281	-0.545557	0.826121	-0.3276		-815.328		0.202891
IrF3-CO	-803.727	-0.386123	0.412683	-0.294169		-803.994		-0.357471
IrF3-CHO	-807.229	-0.327413	0.676191	-0.32529		-807.205		-0.0970694
IrF3-H2COH	-814.888	-0.394715	1.32673	-0.251382		-814.207		-0.156328
IrF3-CH3O	-813.975	-0.51	1.29207	-0.341607		-813.535		0.516055
IrCl3	-790.67	-0.0410125	0.12167	-0.273522		-790.863		0
IrCl3-HCOO	-819.782	-0.229492	0.773641	-0.29439		-819.532		0.729478
IrCl3-COOH	-820.051	-0.357147	0.764542	-0.356308		-820		0.261298
IrCl3-CO	-808.519	-0.176295	0.352536	-0.338514		-808.681		-0.313434
IrCl3-CHO	-811.838	-0.177394	0.613842	-0.34821		-811.75		0.0895342
IrCl3-HCOH	-815.904	-0.239712	0.944582	-0.32326		-815.522		-0.211964
IrCl3-H2COH	-819.503	-0.234799	1.26167	-0.347095		-818.823		-0.0418419
IrCl3-CH2	-807.037	-0.229827	0.80013	-0.293311		-806.76		0.127633
IrCl3-CH3	-811.796	-0.0134104	1.12491	-0.293889		-810.978		-0.618695
